# Supplementary material for: SpitWorm, an Herbivorous Robot: Mechanical Leaf Wounding with Simultaneous Application of Salivary Components
Source: Preprints.org preprint supplement (doi:10.20944/preprints201907.0023.v1), 2019-07-01
Supplement: Supplementary file 1 [file supplementary]

## Supplementary Materials

### SpitWorm, an herbivorous robot: Mechanical leaf wounding with simultaneous application of salivary components

Guanjun Li<sup>1</sup> · Stefan Bartram<sup>1</sup> · Huijuan Guo<sup>2</sup> · Axel Mithöfer<sup>1</sup> · Maritta Kunert<sup>1</sup> · Wilhelm Boland<sup>1\*</sup>

<sup>1</sup> Department of Bioorganic Chemistry, Max Planck Institute for Chemical Ecology, Hans-Knöll-Str. 8, D-07745 Jena, Germany; <sup>2</sup> Leibniz Institute for Natural Product Research and Infection Biology – Hans Knöll Institute (HKI), Beutenbergstr. 11a, D-07745 Jena, Germany

\* Corresponding author; E-mail: [boland@ice.mpg.de](mailto:boland@ice.mpg.de)

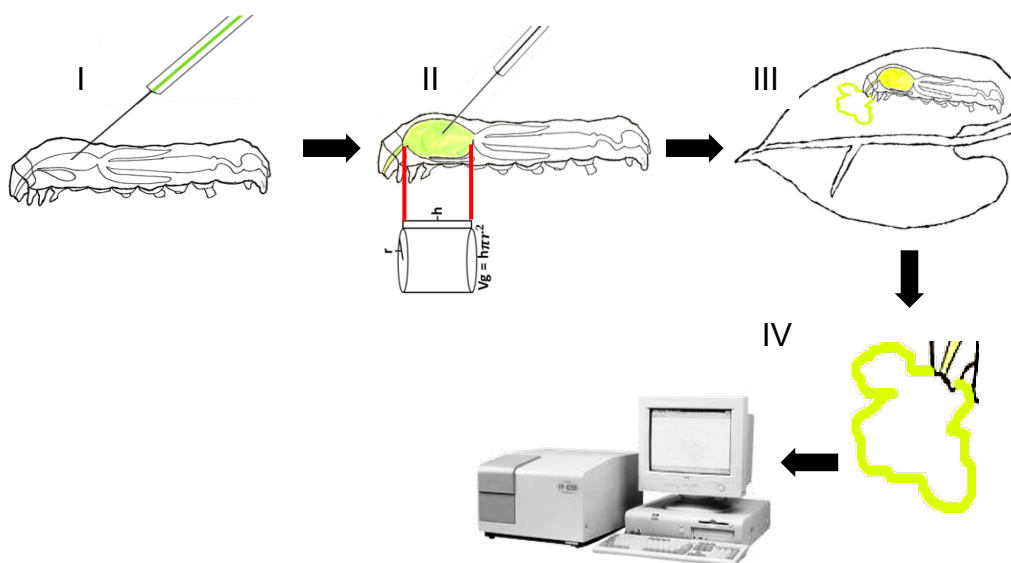

**Figure S1. Workflow for determination of OS amount left at the leaf wounding edges.** (I) *S. littoralis* larva injected with fluorescent dye into the foregut; (II) *S. littoralis* larva foregut dissected and measured as a cylinder; (III) fluorescent dye solution injected larva fed on *P. lunatus* leaf; (IV) fluorescence dye signal at the wounding area of the leaf being quantified.

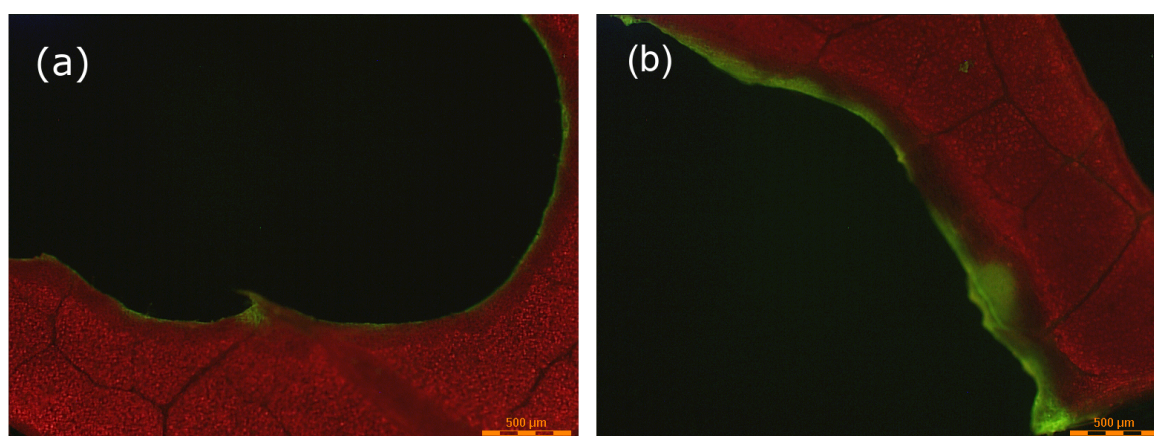

**Figure S2. Comparison of fluorescence signals left in plant wounded sites by insects injected with fluorescent dye.** (a) Leaf wounded by a *S. littoralis* larva with 1 µL injection; (b) wounded by a larva with 5 µL injection of a solution of Lucifer Yellow in water (1 mg·mL<sup>-1</sup>).

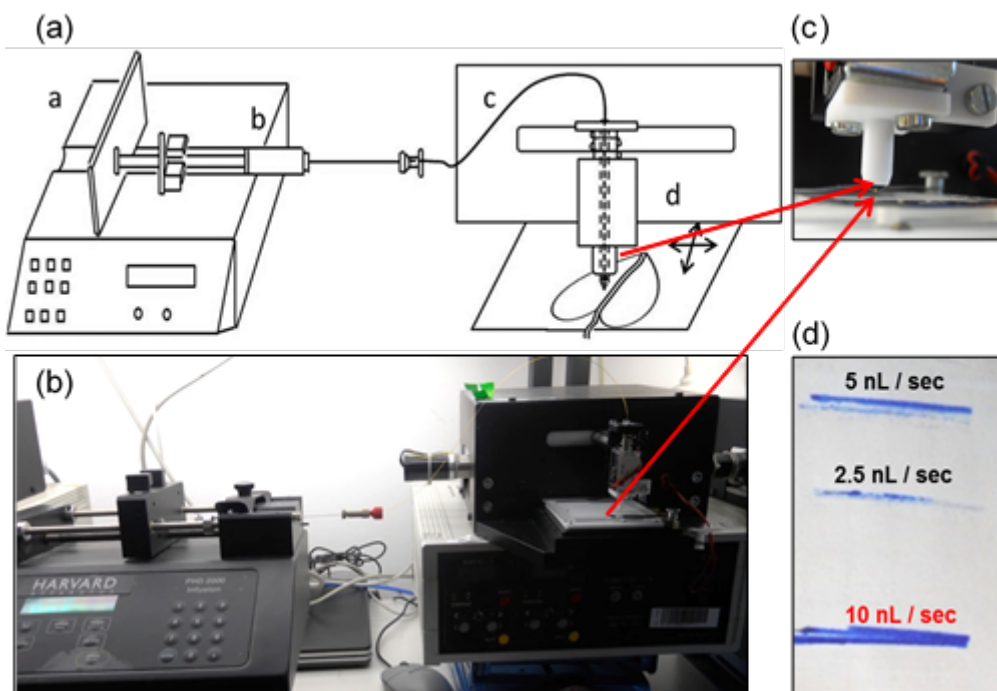

**Figure S3. SpitWorm set-up and flow rate optimization.** (a) Schematic sketch of SpitWorm: a; Syringe pump to control the delivery rate; b; 100  $\mu\text{L}$  syringe; c; fused silica capillary connecting the syringe to MecWorm through the hollow needle which has a little hole at the tip. d; MecWorm, a system for controlled mimicking the feeding behavior of biting insects. (b) Picture of SpitWorm. (c) An enlarged picture of the ‘tooth’ of SpitWorm, with an ink droplet at the tip. (d) Ink trails left by SpitWorm at different fluid delivery rates.

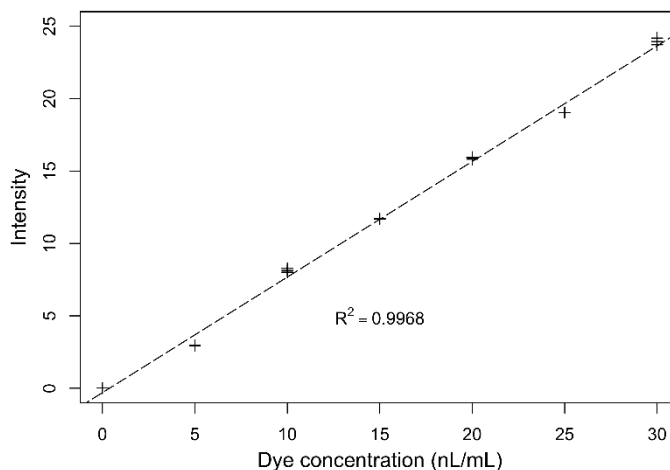

**Figure S1. Standard curve.** Fluorescent signal intensity of different dilutions ( $n = 3$ ) of Lucifer Yellow solution ( $1 \text{ mg} \cdot \text{mL}^{-1}$ ).

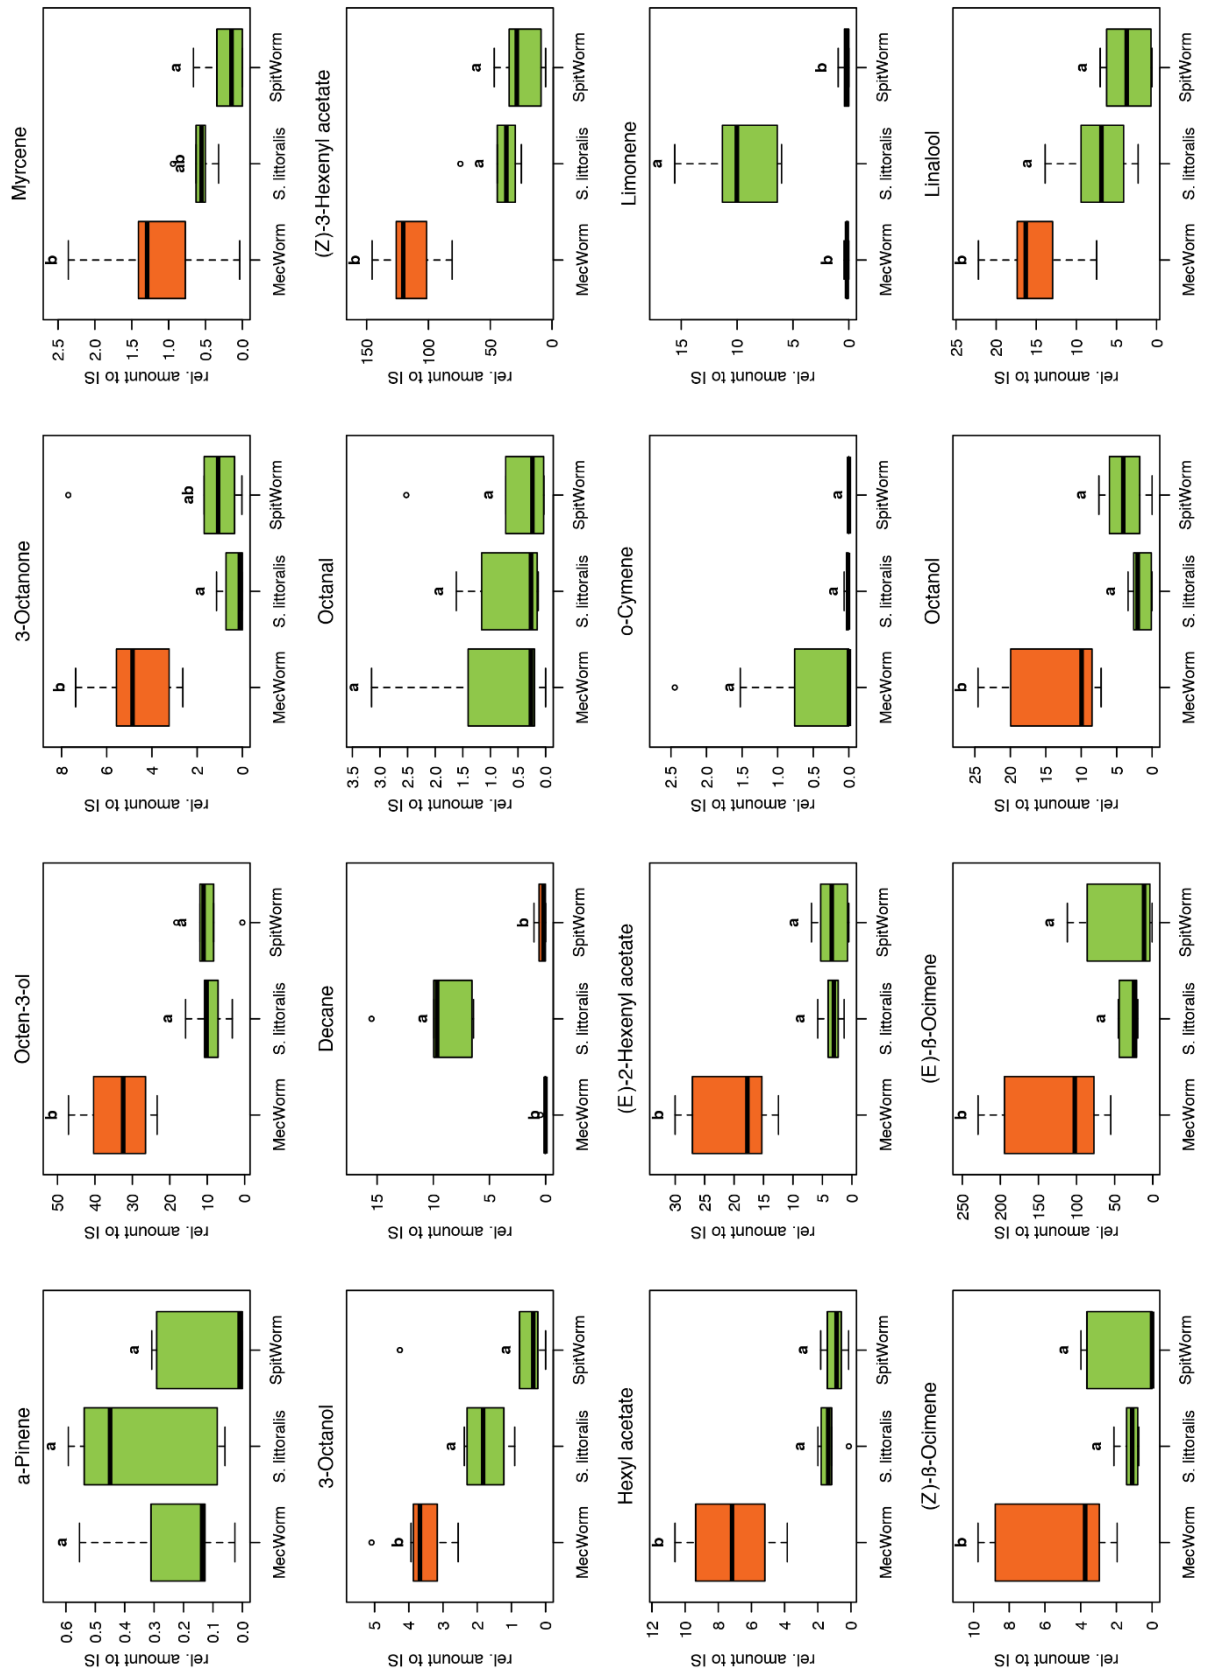

continued ...

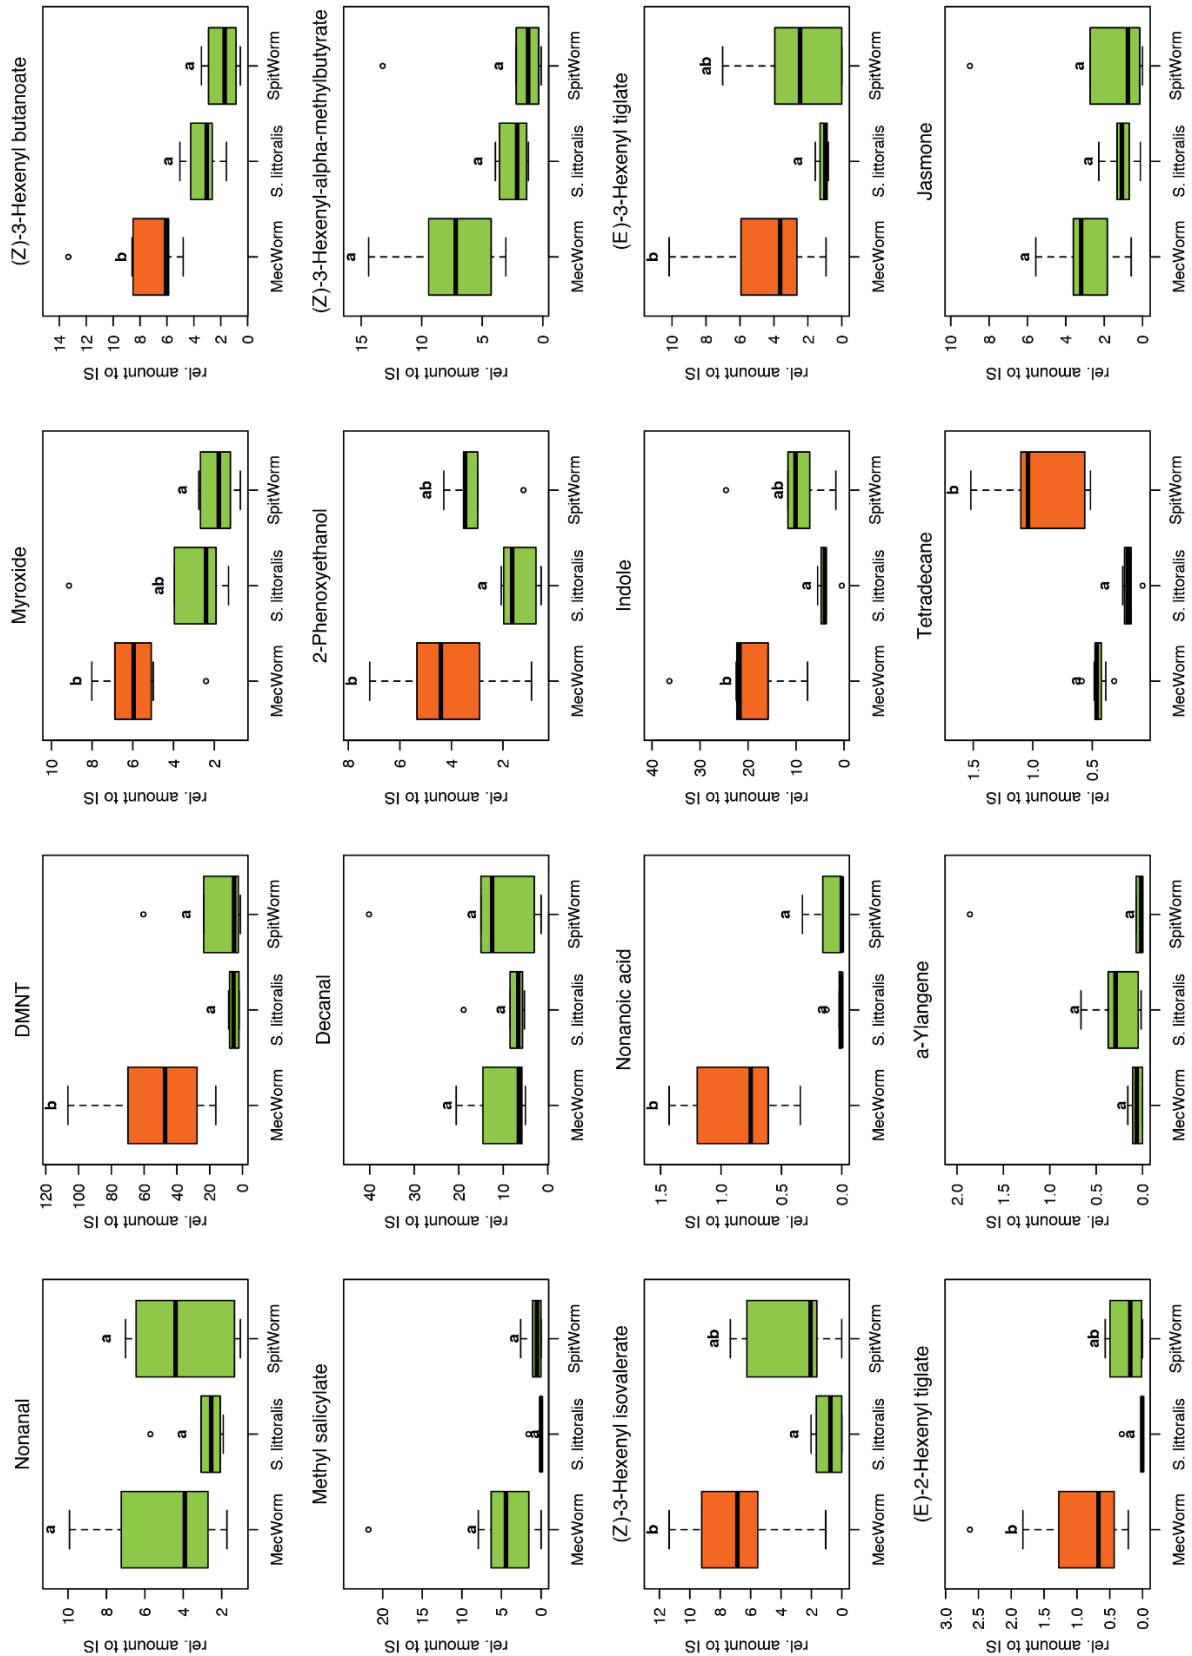

continued ...

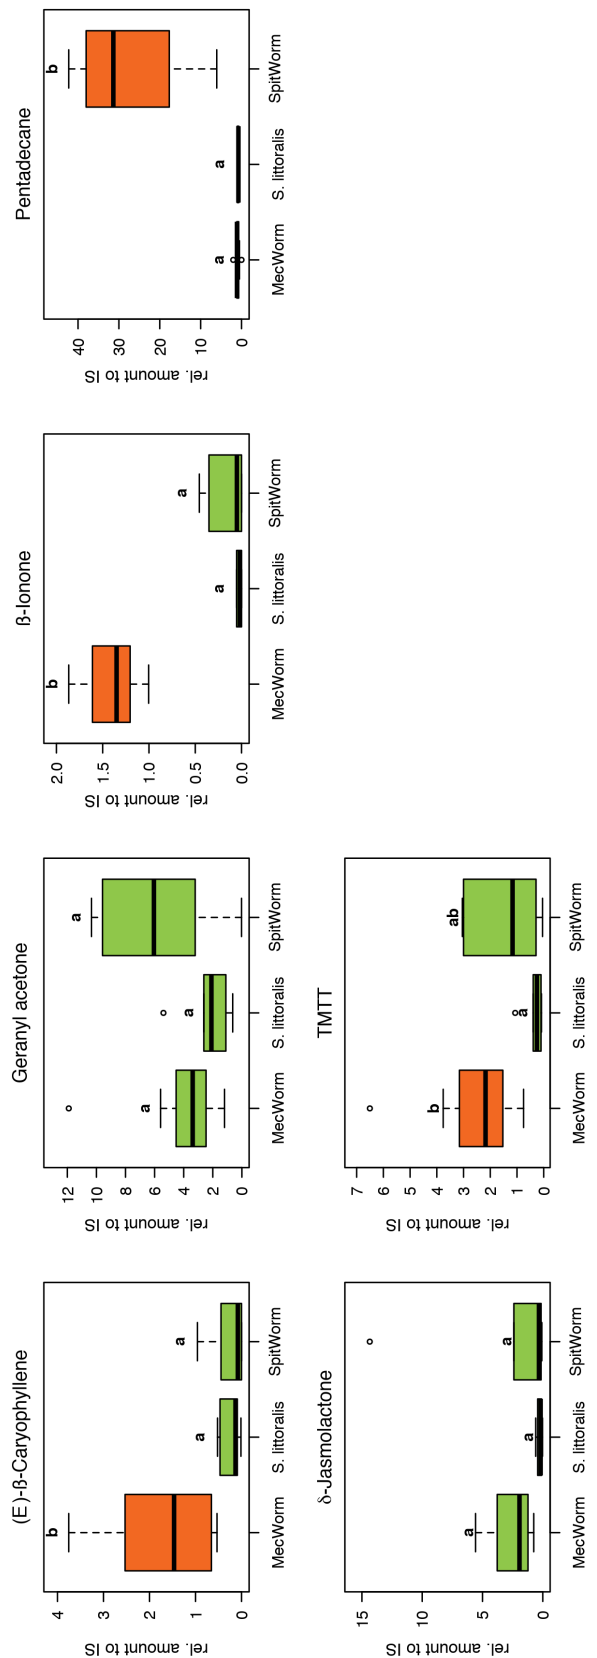

**Figure S5. Comparison of relative amounts of headspace volatiles upon different treatments.** Three different treatments on lima bean leaves (*S. littoralis* larvae, n = 6; MecWorm, n = 7; SpitWorm, n = 6). One-way ANOVA, post hoc test: Tukey's HSD, treatments with identical letters showed no significant difference, equal colors indicate no significant difference to SpitWorm treatment.

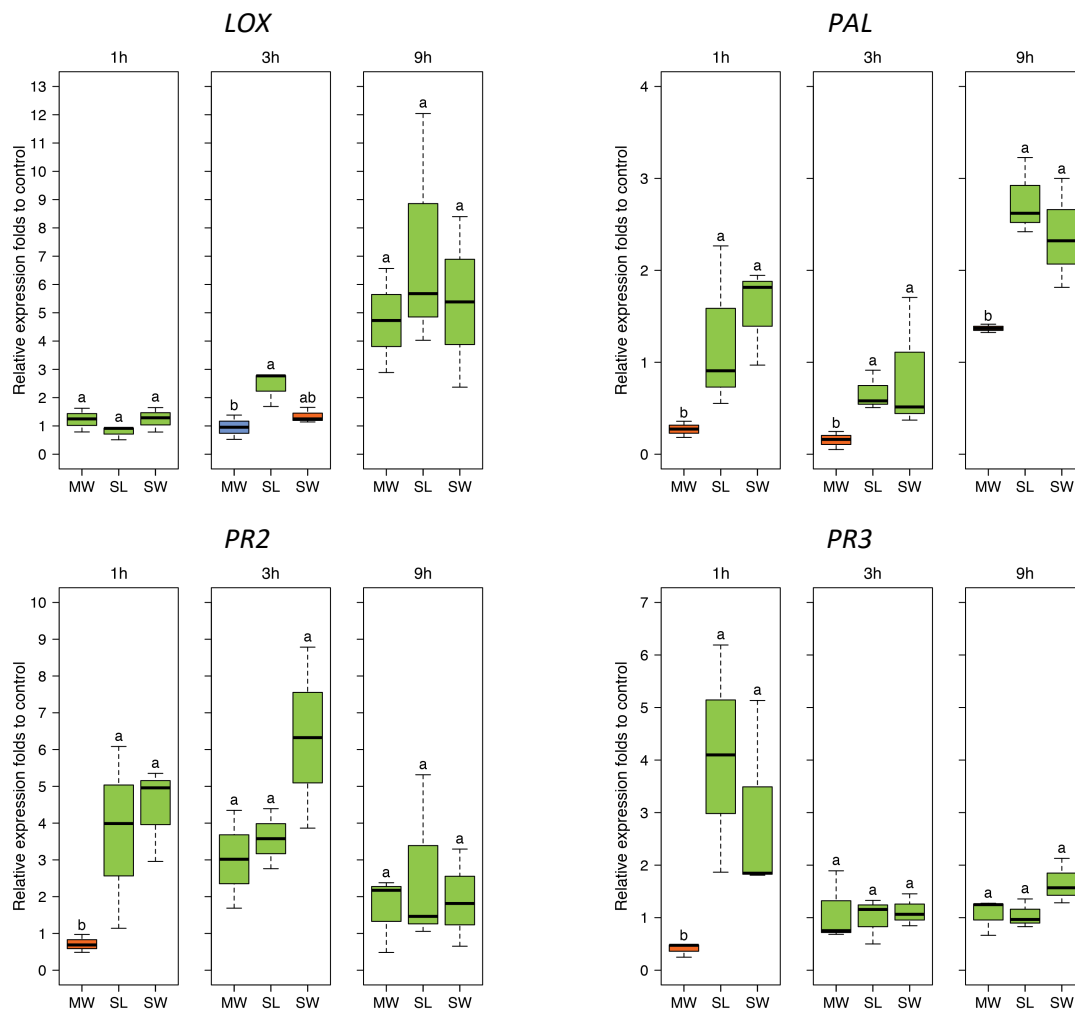

**Figure S6. Expression of four JA responsive genes (*LOX3*, *PAL*, *PR2*, and *PR3*).** Lima beans treated for 1 h, 3 h and 9 h with MecWorm (MW), *S. littoralis* (SL), and SpitWorm (SW; 10 times diluted OS, delivery speed of  $10 \text{ nL}\cdot\text{s}^{-1}$ );  $n = 3$  for each treatment, log<sub>2</sub> transformed, one-way ANOVA, post-hoc test: Fisher's LSD, treatments with identical letters are not significantly different.

**Table S1. Dimensions of larval foreguts.** Lengths (l) and diameters (d) of dissected foreguts were measured. Foregut volume ( $V_g$ ) was calculated by taking the shape of the foregut as a cylinder.

| n    | l (mm) | d (mm) | $V_g$ (mm <sup>3</sup> ) |
|------|--------|--------|--------------------------|
| 1    | 3      | 3      | 21.2                     |
| 2    | 5      | 4      | 62.8                     |
| 3    | 4.3    | 4      | 54.0                     |
| 4    | 5      | 4      | 62.8                     |
| 5    | 4      | 3.8    | 44.2                     |
| mean | 4.3    | 3.8    | 49.0                     |
| sd   | 0.8    | 0.4    | 17.3                     |
